# Supplementary material for: A Peptide-Based Method for 13C Metabolic Flux Analysis in Microbial Communities
Source: PubMed Central journal article supplement (PMC4154649; doi:10.1371/journal.pcbi.1003827), 2014-09-04
Supplement: pcbi.1003827.s002.pdf [file pcbi.1003827.s002.pdf]

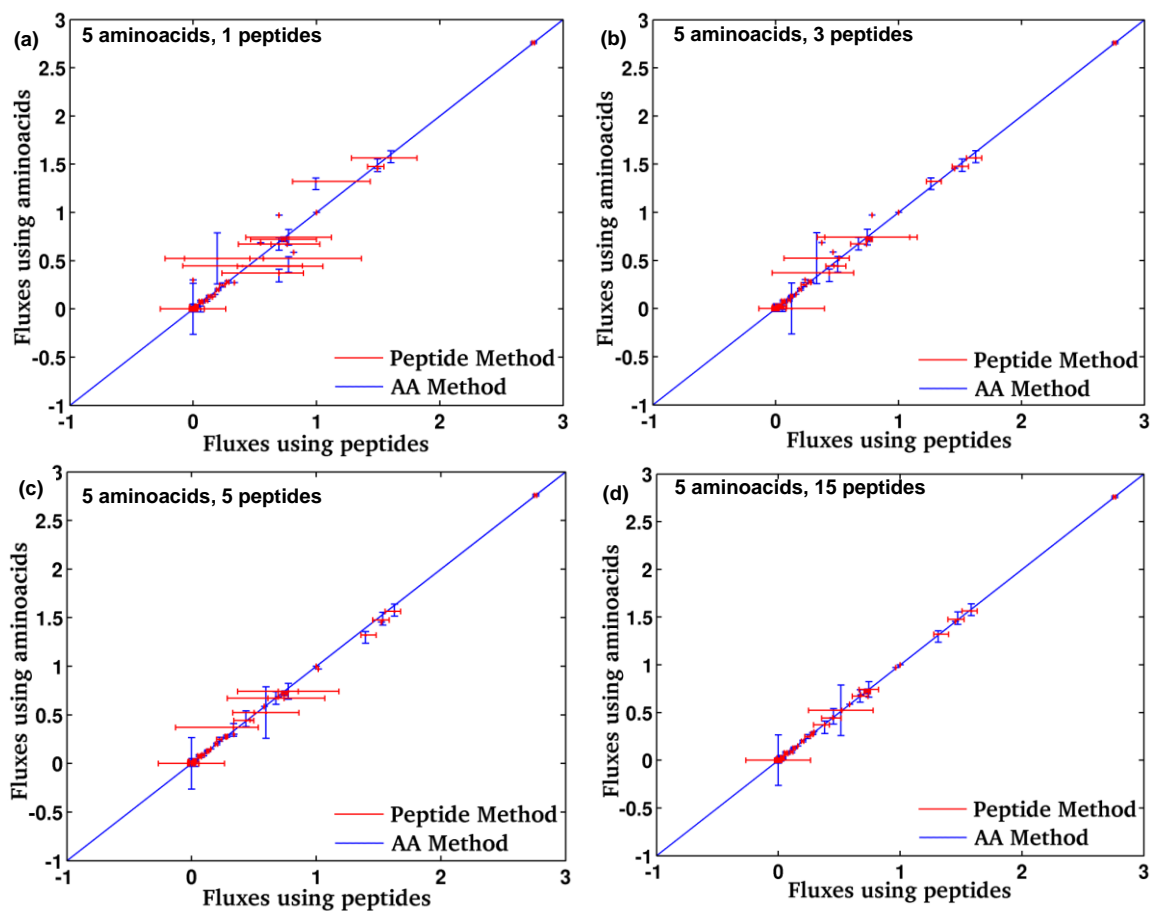

**Figure S2.** Comparison between flux profiles obtained through aminoacid and peptide-based  $^{13}\text{C}$  MFA for different peptide numbers. 10 aminoacid long peptides were chosen for the fit and confidence interval has been estimated for (a) 1 peptide (b) 3 peptides (c) 5 peptides and (d) 15 peptides.
