# Supplementary material for: A Peptide-Based Method for 13C Metabolic Flux Analysis in Microbial Communities
Source: PubMed Central journal article supplement (PMC4154649; doi:10.1371/journal.pcbi.1003827), 2014-09-04
Supplement: pcbi.1003827.s003.pdf [file pcbi.1003827.s003.pdf]

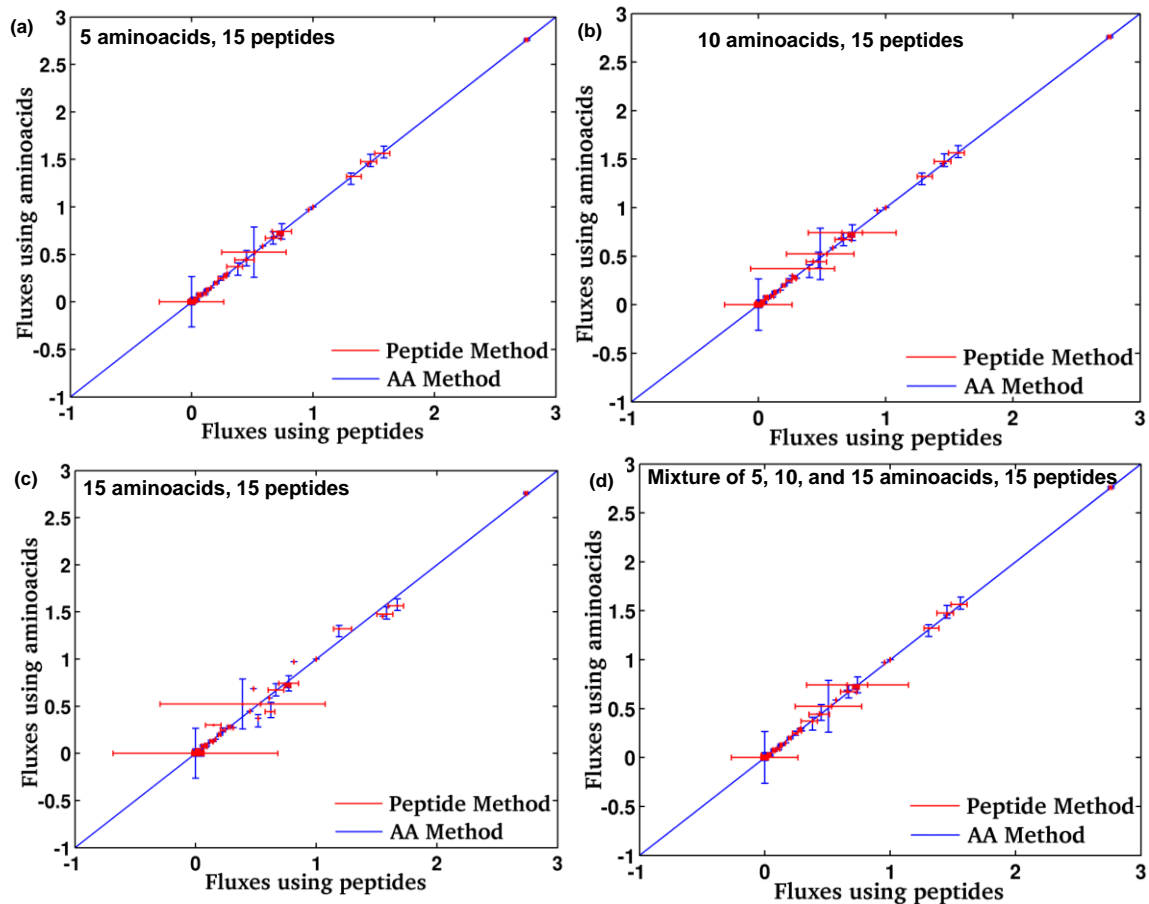

**Figure S3.** Comparison between flux profiles obtained through aminoacid and peptide-based  $^{13}\text{C}$  MFA for different peptide lengths. 15 peptides were used for the fit and fluxes and confidence intervals were determined for the cases: (a) 5 aminoacids (b) 10 aminoacids (c) 15 aminoacids and (d) mixture of 5, 10 and 15 aminoacids.
