# Supplementary material for: A Peptide-Based Method for 13C Metabolic Flux Analysis in Microbial Communities
Source: PubMed Central journal article supplement (PMC4154649; doi:10.1371/journal.pcbi.1003827), 2014-09-04
Supplement: pcbi.1003827.s006.pdf [file pcbi.1003827.s006.pdf]

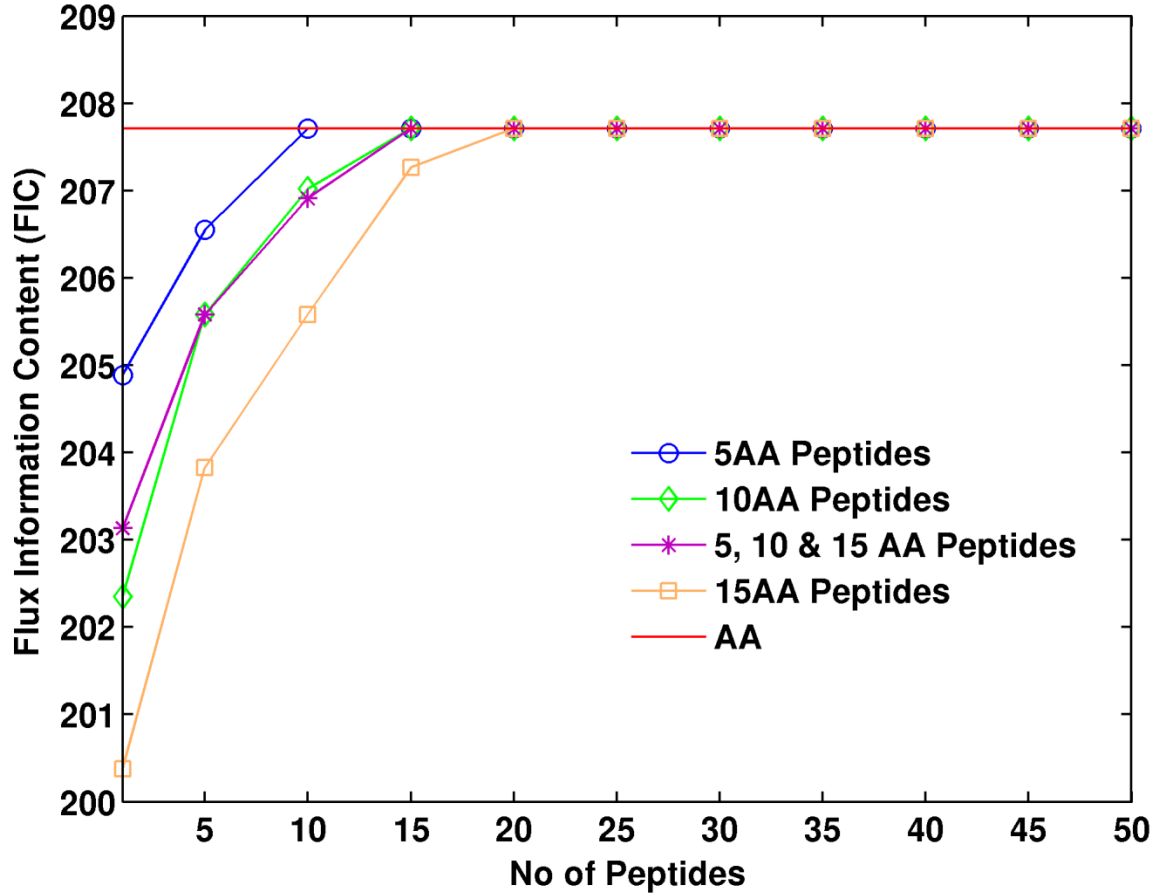

**Figure S6.** Flux Information Content (FIC) for the aminoacid and peptide-based  $^{13}\text{C}$  MFA for *pgi* knockout *E. coli* strain. The same trends as for the wild type can be observed, but in this case the number of required peptides is 15 instead of 20.
