# Supplementary material for: A Peptide-Based Method for 13C Metabolic Flux Analysis in Microbial Communities
Source: PubMed Central journal article supplement (PMC4154649; doi:10.1371/journal.pcbi.1003827), 2014-09-04
Supplement: pcbi.1003827.s007.pdf [file pcbi.1003827.s007.pdf]

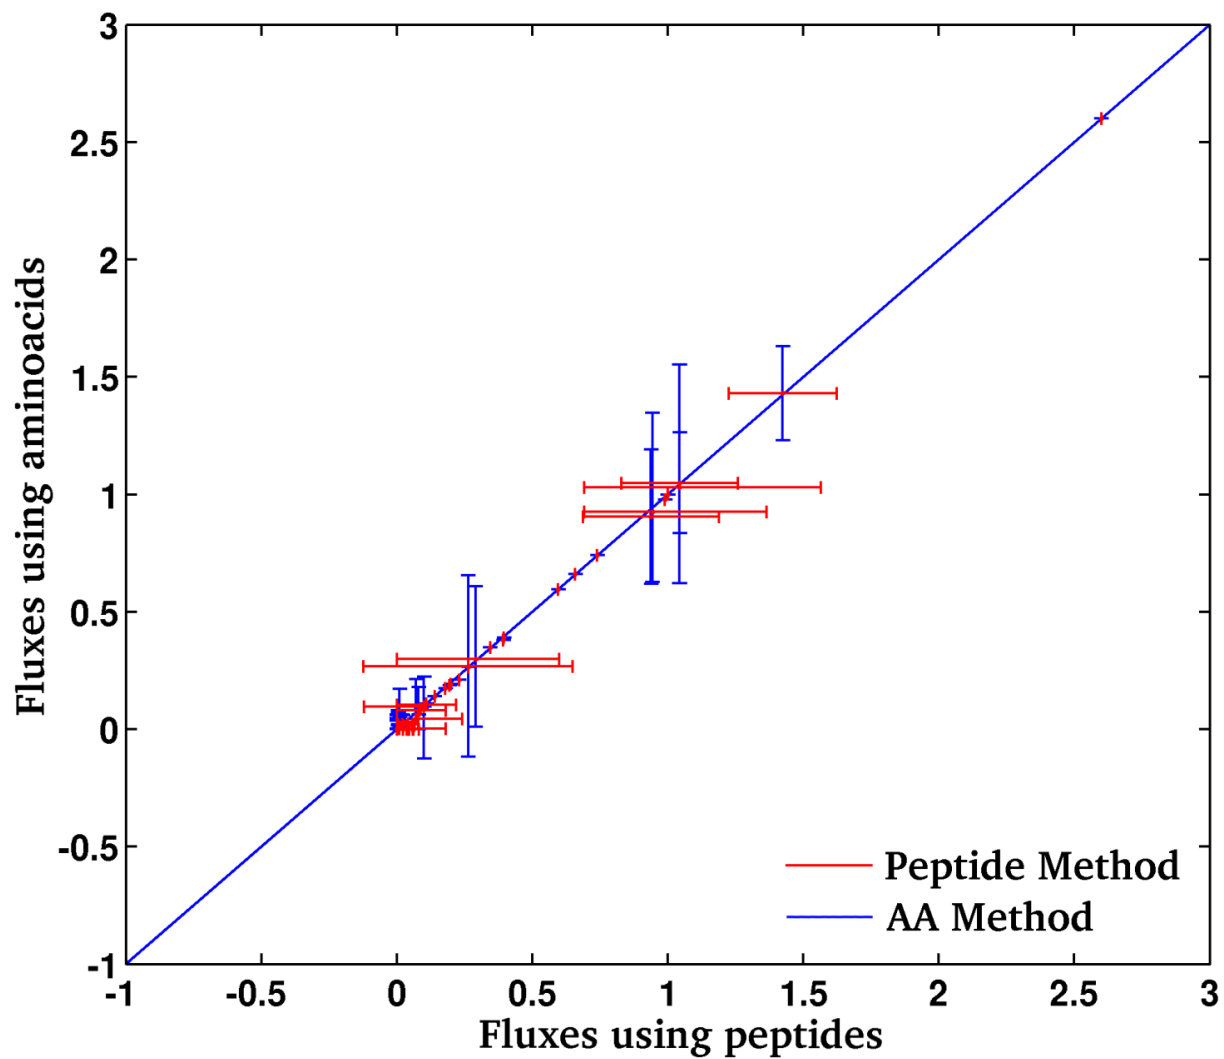

**Figure S7.** Comparison between flux profiles obtained through the amino acid-based and the peptide-based  $^{13}\text{C}$  FMA for *pgi* knockout *E. coli* strain. Peptide based  $^{13}\text{C}$  FMA flux profile obtained for the best fit for peptide lengths of 5 amino acids.
