# Supplementary material for: A Peptide-Based Method for 13C Metabolic Flux Analysis in Microbial Communities
Source: PubMed Central journal article supplement (PMC4154649; doi:10.1371/journal.pcbi.1003827), 2014-09-04
Supplement: pcbi.1003827.s008.pdf [file pcbi.1003827.s008.pdf]

(a)

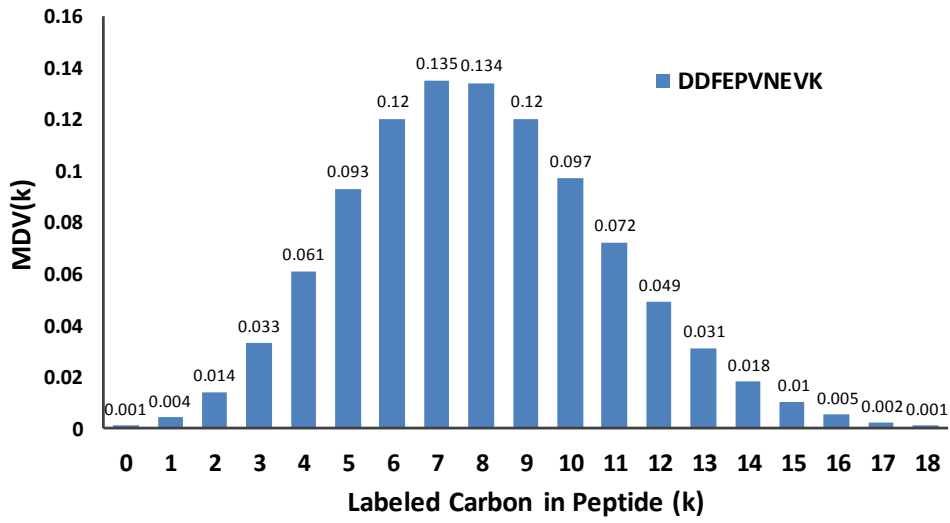

(b)

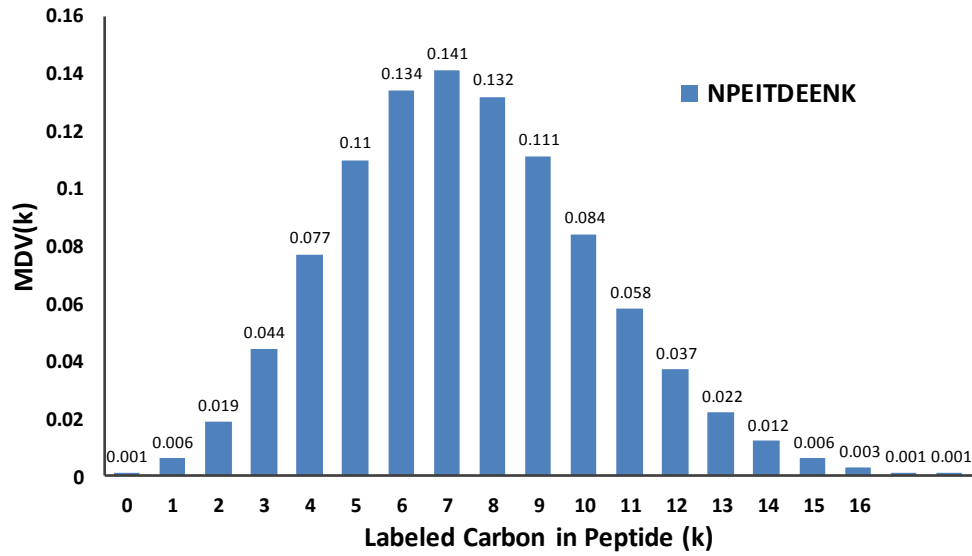

(c)

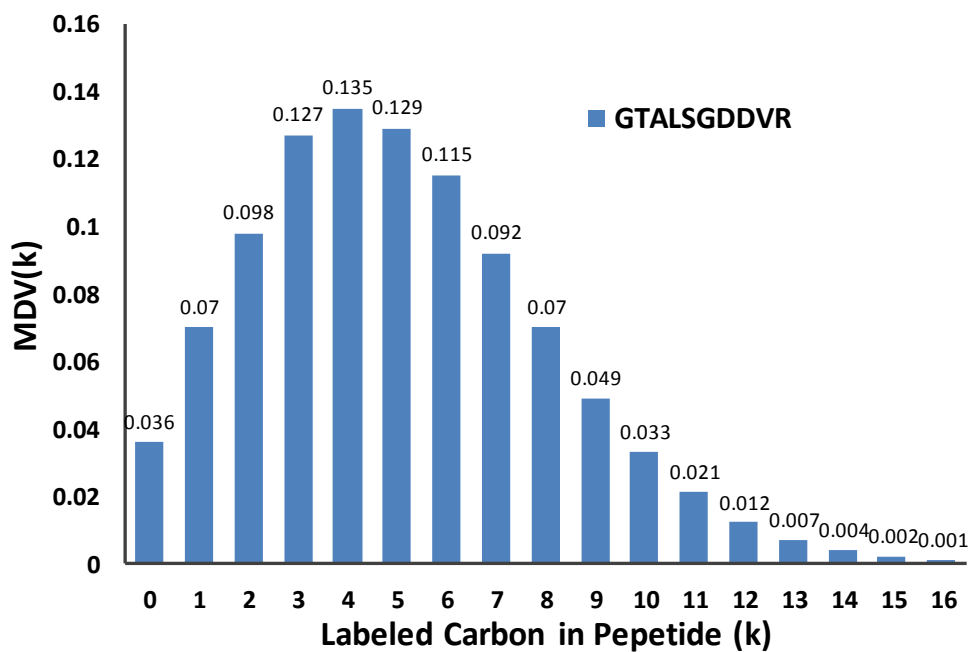

(d)

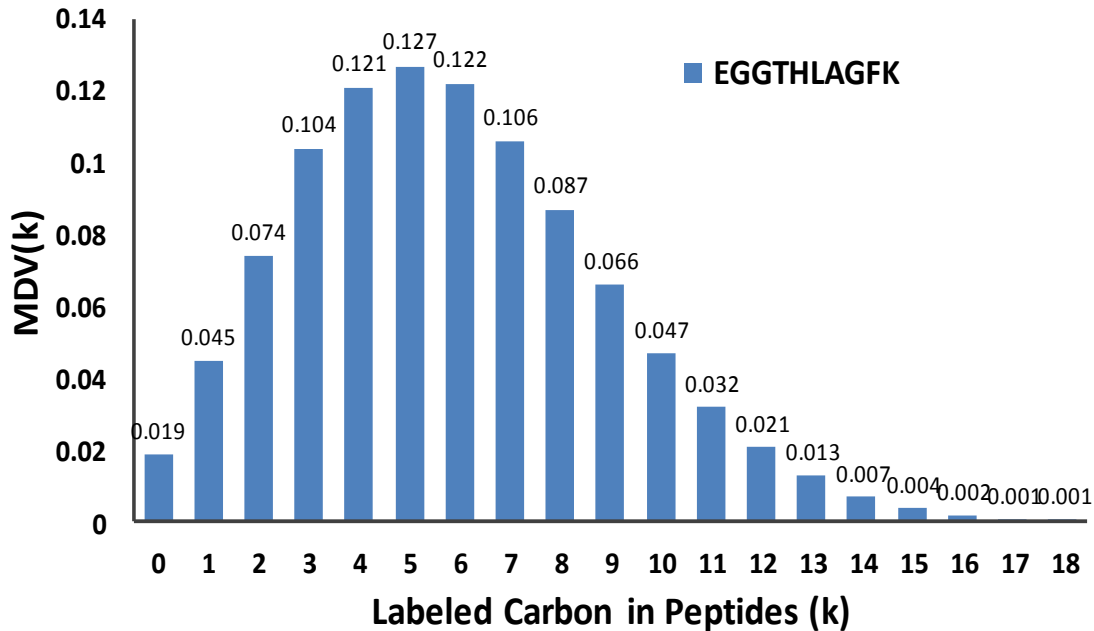

**Figure S7.** Peptide labeling profile for peptide based  $^{13}\text{C}$  MFA obtained for *D. vulgaris* and *M. maripaludis* species in microbial community. Four 10 aminoacids peptides sequences and MDV's were plotted for (a) DDFEPVNEVK, (b) NPEITDEENK, (c) GTALSGDDVR and (d) EGGTHLAGFK.
