# Supplementary material for: A Peptide-Based Method for 13C Metabolic Flux Analysis in Microbial Communities
Source: PubMed Central journal article supplement (PMC4154649; doi:10.1371/journal.pcbi.1003827), 2014-09-04
Supplement: pcbi.1003827.s009.pdf [file pcbi.1003827.s009.pdf]

**Table S1.**

The following list comprises the reactions included in peptide and aminoacid based  $^{13}\text{C}$  MFA methods, along with their corresponding carbon transitions. Carbon transitions indicate the fate of each carbon in the reaction.

|                                         | <i>Reaction Name</i> | <i>Reaction</i>            | <i>Carbon transitions</i><br>obtained from Antoniewicz <i>et al</i> [1] |
|-----------------------------------------|----------------------|----------------------------|-------------------------------------------------------------------------|
|                                         | GLCpts:              | glc-D[e] + pep → g6p + pyr | abcdef + ABC : abcdef + ABC                                             |
| <b>Glycolysis/gluconeogenesis</b>       |                      |                            |                                                                         |
|                                         | PGI:                 | g6p ↔ f6p                  | abcdef : abcdef                                                         |
|                                         | PFK:                 | f6p → fdp                  | abcdef : abcdef                                                         |
|                                         | FBA                  | fdp → g3p + dhap           | CBAabc : abc + ABC                                                      |
|                                         | TPI                  | dhap → g3p                 | abc : abc                                                               |
|                                         | GAPD                 | g3p → 13dpg                | abc : abc                                                               |
|                                         | PGK                  | 3pg → 13dpg                | abc : abc                                                               |
|                                         | PGM                  | 2pg ↔ 3pg                  | abc : abc                                                               |
|                                         | PYK                  | pep → pyr                  | abc : abc                                                               |
|                                         | PDH                  | pyr → co2 + accoa          | abc : a + bc                                                            |
| <b>Pentose Phosphate Pathway</b>        |                      |                            |                                                                         |
|                                         | G6PDH2r              | g6p → 6pgl                 | abcdef : abcdef                                                         |
|                                         | PGL                  | 6pgl → 6pgc                | abcdef : abcdef                                                         |
|                                         | GND                  | 6pgc → co2 + ru5p-D        | abcdef : a + bcdef                                                      |
|                                         | RPE                  | ru5p-D ↔ xu5pD             | abcde : abcde                                                           |
|                                         | RPI                  | r5p ↔ ru5p-D               | abcde : abcde                                                           |
|                                         | TKT1                 | xu5pD + r5p ↔ g3p + s7p    | ABCDE + abcde : CDE + ABabcde                                           |
|                                         | TALA                 | g3p + s7p ↔ f6p + e4p      | ABC + abcdefg : abcABC + defg                                           |
|                                         | TKT2                 | xu5pD + e4p ↔ g3p + f6p    | abABC + cdef : ABC + abcdef                                             |
|                                         | EDD                  | 6pgc → 2ddg6p              | abcdef : abcdef                                                         |
|                                         | EDA                  | 2ddg6p → pyr + g3p         | abcdef : abc + def                                                      |
| <b>Citric Acid Cycle/TCA</b>            |                      |                            |                                                                         |
|                                         | CS                   | oaa + accoa → cit          | abcd + AB : dcbBAa                                                      |
|                                         | ACONT                | cit → icit                 | abcdef : abcdef                                                         |
|                                         | ICDH <sub>y</sub>    | icit → akg + co2           | abcdef : abcde + f                                                      |
|                                         | AKGDH                | akg → succoa + co2         | abcde : bcde + a                                                        |
|                                         | SUCOAS               | succ ↔ succoa              | bcde : (bcde;edcb)                                                      |
|                                         | SUCDi                | succ → fum                 | abcd : abcd                                                             |
|                                         | FUM                  | fum → mal-L                | abcd : abcd                                                             |
|                                         | MDH                  | mal-L ↔ oaa                | abcd : abcd                                                             |
| <b>Anaplerotic reactions</b>            |                      |                            |                                                                         |
|                                         | ENO                  | 2pg ↔ pep                  | abc : abc                                                               |
|                                         | PPC                  | pep + co2 → oaa            | abc + d : abcd                                                          |
|                                         | PPCK                 | oaa → pep + co2            | abcd : abc + d                                                          |
|                                         | ME1                  | mal-L → pyr + co2          | abcd : abc + d                                                          |
|                                         | ICL                  | icit → succ + glx          | ABCDEF : FCDE + AB                                                      |
|                                         | MALS                 | glx + accoa → mal-L        | AB + CD : ABCD                                                          |
| <b>Alanine and aspartate metabolism</b> |                      |                            |                                                                         |
|                                         | ALATA_L              | pyr → ala-L                | abc : abc                                                               |
|                                         | ASPTA                | oaa → asp-L                | abcd : abcd                                                             |
|                                         | Asnsyn               | aspL → asn-L               | abcd : abcd                                                             |
|                                         | Metsyn               | aspL + mlthf → met-L       | abcd + e : abcde                                                        |
| <b>Glutamate metabolism</b>             |                      |                            |                                                                         |

|                                           |          |                                      |                            |
|-------------------------------------------|----------|--------------------------------------|----------------------------|
|                                           | GLUDy    | glu-L $\leftrightarrow$ akg          | abcde : abcde              |
|                                           | GLNS     | glu-L $\rightarrow$ gln-L            | abcde : abcde              |
|                                           | Prosyn   | gluL $\rightarrow$ pro-L             | abcde : abcde              |
|                                           | Argsyn   | gluL + co2 $\rightarrow$ arg-L       | abcde + f : abcdef         |
| Glycine and serine metabolism             |          |                                      |                            |
|                                           | PGCD     | 3pg $\rightarrow$ ser-L              | abc : abc                  |
|                                           | GHMT2    | ser-L $\rightarrow$ mlthf + gly      | abc : c + ab               |
|                                           | Cyssyn   | serL $\rightarrow$ cysL              | abc : abc                  |
| Threonine and lysine metabolism           |          |                                      |                            |
|                                           | ASPK     | asp-L $\rightarrow$ thrL             | abcd : abcd                |
|                                           | Lyssyn   | aspL + pyr $\rightarrow$ lys-L + co2 | abcd + efg : abcdgf + e    |
| Valine, leucine and isoleucine metabolism |          |                                      |                            |
|                                           | ValSyn2  | pyr + pyr $\rightarrow$ val-L + co2  | abc + def : abcef + d      |
|                                           | llesyn   | thrL + pyr $\rightarrow$ ile-L + co2 | abcd + efg : abfcgd + e    |
|                                           | ACLS     | pyr + accoa $\rightarrow$ pyrb       | cde + ab : abde + c        |
|                                           | LeuSyn   | pyrb + pyr $\rightarrow$ leu-L + co2 | abde + fgh : abdghe + f    |
| Tyrosine and phenylalanine metabolism     |          |                                      |                            |
|                                           | Presyn   | pep + e4p $\rightarrow$ co2 +pre     | def + ghij : d + efg hij   |
|                                           | PheSyn2  | pre+ pep $\rightarrow$ phe-L         | efghij + abc : abcefg hij  |
|                                           | TyrSyn   | pre + pep $\rightarrow$ tyr-L        | efghij + abc : abcefg hij  |
| Histidine and tryptophan metabolism       |          |                                      |                            |
|                                           | PRPPS    | r5p + mlthf $\rightarrow$ his-L      | abcde + f : edcbaf         |
|                                           | Tipsyn   | serL + r5p $\rightarrow$ tip + g3p   | abc + defgh : abcd + fgh   |
|                                           | Trpsyn   | tip + pre $\rightarrow$ trpL         | abcd + BCEFGH : abcdCEFGHB |
| Biomass fluxes:                           |          |                                      |                            |
|                                           | G6Pbm    | g6p $\rightarrow$ g6pbm              | abcdef : abcdef            |
|                                           | F6Pbm    | f6p $\rightarrow$ f6pbm              | abcdef : abcdef            |
|                                           | R5Pbm    | r5p $\rightarrow$ r5pbm              | abcde : abcde              |
|                                           | E4Pbm    | e4p $\rightarrow$ e4pbm              | abcd : abcd                |
|                                           | G3Pbm    | g3p $\rightarrow$ g3pbm              | abc : abc                  |
|                                           | 13dpgbm  | 13dpg $\rightarrow$ 13dpgbm          | abc : abc                  |
|                                           | PEPbm    | pep $\rightarrow$ pepbm              | abc : abc                  |
|                                           | PYRbm    | pyr $\rightarrow$ pyrbm              | abc : abc                  |
|                                           | AcCoabm  | accoa $\rightarrow$ accoabm          | ab : ab                    |
|                                           | OAAbm    | oaa $\rightarrow$ oaabm              | abcd : abcd                |
|                                           | AKGbm    | akg $\rightarrow$ akgbm              | abcde : abcde              |
|                                           | CO2bm    | co2 $\rightarrow$ co2bm              | a : a                      |
| Fluxes out:                               |          |                                      |                            |
|                                           | L_LACt2r | pyr $\rightarrow$ lacL               | abc : abc                  |
|                                           | ADHer    | accoa $\rightarrow$ etoh             | ab : ab                    |
|                                           | ETOht2r  | etoh $\rightarrow$ etOHE             | ab : ab                    |
|                                           | ACACCT   | accoa $\rightarrow$ acE              | ab : ab                    |
