# Supplementary material for: A Peptide-Based Method for 13C Metabolic Flux Analysis in Microbial Communities
Source: PubMed Central journal article supplement (PMC4154649; doi:10.1371/journal.pcbi.1003827), 2014-09-04
Supplement: pcbi.1003827.s010.pdf [file pcbi.1003827.s010.pdf]

**Table S2.** Flux values for aminoacids and peptide method for 5 aminoacids and 15 peptides.

| Rxns    | Best Fit |                   | Flux Range |                   |
|---------|----------|-------------------|------------|-------------------|
|         | AA       | Peptides (5AA,1P) | AA         | Peptides (5AA,1P) |
| 13dpgbm | 0.0900   | 0.1100            | 0.0200     | 0.0200            |
| accoabm | 0.2800   | 0.2800            | 0.0200     | 0.0200            |
| akgbm   | 0.0700   | 0.0700            | 0.0200     | 0.0200            |
| co2bm   | 2.7600   | 2.7600            | 0.0200     | 0.0200            |
| e4pbm   | 0.0237   | 0.0381            | 0.0200     | 0.0200            |
| f6pbm   | 0.0000   | 0.0000            | 0.0000     | 0.0000            |
| FUM     | 0.6722   | 0.6722            | 0.1306     | 0.1306            |
| g3pbm   | 0.0000   | 0.0000            | 0.0000     | 0.0000            |
| g6pbm   | 0.0300   | 0.0300            | 0.0200     | 0.0200            |
| oaabm   | 0.1300   | 0.1300            | 0.0200     | 0.0200            |
| pepbm   | 0.0300   | 0.0300            | 0.0200     | 0.0200            |
| pyrbm   | 0.2000   | 0.2000            | 0.0200     | 0.0200            |
| r5pbm   | 0.0800   | 0.0600            | 0.0200     | 0.0200            |
| ACACCT  | 0.0000   | 0.0000            | 0.0000     | 0.0000            |
| ACLS    | 0.0001   | 0.0001            | 0.0599     | 0.0599            |
| ACONT   | 0.7425   | 0.7425            | 0.1612     | 0.1612            |
| ADHer   | 0.0000   | 0.0000            | 0.0000     | 0.0000            |
| AKGDH   | 0.3726   | 0.3812            | 0.1306     | 0.1306            |
| ALATA_L | 0.0001   | 0.0001            | 0.0599     | 0.0599            |
| ASPK    | 0.0001   | 0.0001            | 0.0596     | 0.0596            |
| ASPTA   | 0.0004   | 0.0004            | 0.0596     | 0.0596            |
| Argsyn  | 0.0001   | 0.0001            | 0.0597     | 0.0597            |
| Asnsyn  | 0.0001   | 0.0001            | 0.0596     | 0.0596            |
| CS      | 0.7425   | 0.7425            | 0.1612     | 0.1612            |
| Cyssyn  | 0.0001   | 0.0001            | 0.0596     | 0.0596            |
| EDA     | 0.0000   | 0.0000            | 0.0000     | 0.0000            |
| EDD     | 0.0000   | 0.0000            | 0.0000     | 0.0000            |
| ENO     | 1.4545   | 1.4545            | 0.0000     | 0.0000            |
| ETOHt2r | 0.0000   | 0.0000            | 0.0000     | 0.0000            |
| FBA     | 0.7204   | 0.7304            | 0.0516     | 0.0516            |
| G6PDH2r | 0.5229   | 0.5229            | 0.0000     | 0.0000            |
| GAPD    | 1.5656   | 1.5835            | 0.1251     | 0.1251            |
| GHMT2   | 0.0209   | 0.0187            | 0.0596     | 0.0596            |
| GLCpts  | 1.0000   | 1.0000            | 0.0000     | 0.0000            |
| GLUDy   | 0.0003   | 0.0003            | 0.0597     | 0.0597            |
| GND     | 0.5229   | 0.5229            | 0.0000     | 0.0000            |
| Glnsyn  | 0.0001   | 0.0001            | 0.0597     | 0.0597            |
| ICDHyr  | 0.4429   | 0.4515            | 0.1612     | 0.1612            |

| Rxns     | Best Fit |                   | Flux Range |                   |
|----------|----------|-------------------|------------|-------------------|
|          | AA       | Peptide (5AA,15P) | AA         | Peptide (5AA,15P) |
| ICL      | 0.2996   | 0.2910            | 0.0000     | 0.0000            |
| llesyn   | 0.0001   | 0.0001            | 0.0599     | 0.0599            |
| L_LACt2r | 0.0000   | 0.0000            | 0.0000     | 0.0000            |
| LeuSyn   | 0.0001   | 0.0001            | 0.0599     | 0.0599            |
| Lyssyn   | 0.0001   | 0.0001            | 0.0596     | 0.0596            |
| MALS     | 0.2996   | 0.2910            | 0.0000     | 0.0000            |
| MDH      | 0.9718   | 0.9633            | 0.0000     | 0.0000            |
| ME1      | 0.0000   | 0.0000            | 0.5310     | 0.5310            |
| Metsyn   | 0.0001   | 0.0001            | 0.0596     | 0.0596            |
| PDH      | 1.3221   | 1.3136            | 0.1199     | 0.1199            |
| PFK      | 0.7204   | 0.7304            | 0.0516     | 0.0516            |
| PGCD     | 0.0211   | 0.0189            | 0.0596     | 0.0596            |
| PGI      | 0.4471   | 0.4471            | 0.0000     | 0.0000            |
| PGK      | 1.4756   | 1.4735            | 0.1326     | 0.1326            |
| PGL      | 0.5229   | 0.5229            | 0.0000     | 0.0000            |
| PGM      | 1.4545   | 1.4545            | 0.0000     | 0.0000            |
| PPC      | 0.5862   | 0.5866            | 0.0000     | 0.0000            |
| PPCK     | 0.6850   | 0.6768            | 0.0000     | 0.0000            |
| PRPPS    | 0.0208   | 0.0186            | 0.0526     | 0.0526            |
| PYK      | 0.5228   | 0.5143            | 0.5310     | 0.5310            |
| PheSyn2  | 0.0001   | 0.0001            | 0.0467     | 0.0467            |
| Presyn   | 0.0003   | 0.0003            | 0.0467     | 0.0467            |
| Prosyn   | 0.0001   | 0.0001            | 0.0597     | 0.0597            |
| RPE      | 0.2734   | 0.2833            | 0.0000     | 0.0000            |
| RPI      | 0.2496   | 0.2396            | 0.0425     | 0.0425            |
| SUCD1i   | 0.6722   | 0.6722            | 0.1306     | 0.1306            |
| SUCOAS   | 0.3726   | 0.3812            | 0.0000     | 0.0000            |
| TALA     | 0.1487   | 0.1608            | 0.0000     | 0.0000            |
| THRAr    | 0.0001   | 0.0001            | 0.0596     | 0.0596            |
| TKT1     | 0.1487   | 0.1608            | 0.0000     | 0.0000            |
| TKT2     | 0.1247   | 0.1225            | 0.0000     | 0.0000            |
| TPI      | 0.7204   | 0.7304            | 0.0238     | 0.0238            |
| Tipsyn   | 0.0001   | 0.0001            | 0.0147     | 0.0147            |
| Trpsyn   | 0.0001   | 0.0001            | 0.0147     | 0.0147            |
| Tyrsyn   | 0.0001   | 0.0001            | 0.0443     | 0.0443            |
| ValSyn1  | 0.0001   | 0.0001            | 0.0323     | 0.0323            |
| ValSyn2  | 0.0001   | 0.0001            | 0.0323     | 0.0323            |
