# Supplementary material for: A Peptide-Based Method for 13C Metabolic Flux Analysis in Microbial Communities
Source: PubMed Central journal article supplement (PMC4154649; doi:10.1371/journal.pcbi.1003827), 2014-09-04
Supplement: pcbi.1003827.s011.pdf [file pcbi.1003827.s011.pdf]

**Table S3.** List of *Desulfovibrio vulgaris* reactions included in peptide and aminoacid based  $^{13}\text{C}$  MFA methods, along with their corresponding carbon transitions.

|                                  | <i>Reaction Name</i>      | <i>Reaction</i>         | <i>Carbon transitions</i><br>obtained from Antoniewicz <i>et al</i> [1] |
|----------------------------------|---------------------------|-------------------------|-------------------------------------------------------------------------|
| Glycolysis/gluconeogenesis       | LACpts:                   | lac → pyr               | abc : abc                                                               |
|                                  | PGI:                      | g6p ↔ f6p               | abcdef : abcdef                                                         |
|                                  | PFK:                      | f6p ↔ fdp               | abcdef : abcdef                                                         |
|                                  | FBA                       | fdp ↔ g3p + g3p         | CBAabc : abc + ABC                                                      |
|                                  | GPDH                      | g3p ↔ 3pg               | abc : abc                                                               |
|                                  | PGMTe                     | 3pg ↔ pep               | abc : abc                                                               |
|                                  | PYK_f                     | pep → pyr               | abc : abc                                                               |
|                                  | PYK_b                     | pyr → pep               | abc : abc                                                               |
|                                  | PFOXDR                    | pyr ↔ co2 + accoa       | abc : a + bc                                                            |
|                                  | PYRCO2L                   | pyr + co2 → oaa         | abc + d : abcd                                                          |
|                                  | Pentose Phosphate Pathway | G6PDH                   | g6p → co2 + ru5p-D                                                      |
| RPE                              |                           | ru5p-D ↔ xu5pD          | abcde : abcde                                                           |
| RPI                              |                           | r5p ↔ ru5p-D            | abcde : abcde                                                           |
| TKT1                             |                           | xu5pD + r5p ↔ g3p + s7p | ABCDE + abcde : CDE + ABabcde                                           |
| TALA                             |                           | g3p + s7p ↔ f6p + e4p   | ABC + abcdefg : abcABC + defg                                           |
| TKT2                             |                           | xu5pD + e4p ↔ g3p + f6p | abABC + cdef : ABC + abcdef                                             |
| Citric Acid Cycle/TCA            | ACS                       | ac → accoa              | ab : ab                                                                 |
|                                  | CS                        | oaa + accoa → cit       | abcd + AB : dcbBAa                                                      |
|                                  | CHL                       | cit ↔ icit              | abcdef : abcdef                                                         |
|                                  | ICDHyr                    | icit ↔ akg + co2        | abcdef : abcde + f                                                      |
|                                  | AKGS                      | akg ↔ succoa + co2      | abcde : bcde + a                                                        |
|                                  | SUCOAS                    | succ ↔ succoa           | bcde : (bcde;edcb)                                                      |
|                                  | SUCOXDR                   | succ ↔ fum              | abcd : abcd                                                             |
|                                  | FUM                       | fum ↔ mal-L             | abcd : abcd                                                             |
|                                  | MDH                       | mal-L ↔ oaa             | abcd : abcd                                                             |
|                                  | Anaplerotic reactions     | ME2                     | mal-L → pyr + co2                                                       |
| MALS                             |                           | glx + accoa → mal-L     | AB + CD : ABCD                                                          |
| Fluxes out                       | PFL                       | pyr ↔ accoa + for       | abc : ab + c                                                            |
|                                  | FDHfdx                    | for → co2               | a : a                                                                   |
|                                  | EX_co2                    | co2 ↔ co2E              | a : a                                                                   |
|                                  | GLYCL                     | gly ↔ co2 + mlthf       | ab : a + b                                                              |
|                                  | MTHFDH                    | mlthf --> for           | a : a                                                                   |
|                                  | EX_for                    | for ↔ forE              | a : a                                                                   |
|                                  | PTAr                      | accoa ↔ actp            | ab : ab                                                                 |
|                                  | ACKr                      | actp ↔ ac               | ab : ab                                                                 |
|                                  | EX_ac                     | ac ↔ acE                | ab : ab                                                                 |
|                                  | GLYAK                     | g3p ↔ glyc3p            | abc : abc                                                               |
|                                  | GLYK                      | glyc3p → glyc           | abc : abc                                                               |
|                                  | EX_glyc                   | glyc ↔ glycE            | abc : abc                                                               |
| Alanine and aspartate metabolism | ALATRA                    | pyr → ala-L             | abc : abc                                                               |
|                                  | ASPTA                     | oaa → asp-L             | abcd : abcd                                                             |

|                                           |         |                                       |                                               |
|-------------------------------------------|---------|---------------------------------------|-----------------------------------------------|
|                                           | ASNS    | aspL → asn-L                          | abcd : abcd                                   |
|                                           | CYSMETT | homL + mlthf → metL                   | abcd + e : abcde                              |
| Glutamate metabolism                      | GLUD    | akg → glu-L                           | abcde : abcde                                 |
|                                           | GLNS    | glu-L → gln-L                         | abcde : abcde                                 |
|                                           | PROOX   | gluL → pro-L                          | abcde : abcde                                 |
|                                           | GLUACTR | gluL + co2 → arg-L                    | abcde + f : abcdef                            |
| Glycine and serine metabolism             | PGDH    | 3pg → ser-L                           | abc : abc                                     |
|                                           | GHMT2r  | ser-L ↔ mlthf + gly                   | abc : c + ab                                  |
|                                           | SERACT  | serL → cysL                           | abc : abc                                     |
| Threonine and lysine metabolism           | HSDy    | asa → homL                            | abcd : abcd                                   |
|                                           | THRLS   | homL → thrL                           | abcd : abcd                                   |
|                                           | THRAr   | thrL → gly + accoa                    | abcd : ab + cd                                |
|                                           | ASPSDH  | aspL → asa                            | abcd : abcd                                   |
|                                           | DHDPS   | pyr + asa → ddp                       | efg + abcd : abcdgfe                          |
|                                           | DHDPRy  | ddp → thdp                            | abcdefg : abcdefg                             |
|                                           | DAPDC   | thdp → lysL + co2                     | abcdefg : abcdef + g                          |
| Valine, leucine and isoleucine metabolism | ValSyn  | pyr → pyrb                            | abc : abc                                     |
|                                           | ACLS    | pyrb + pyr → alacS + co2              | abc + def : abcef + d                         |
|                                           | KADTi   | alacS → 3mob                          | abcde : abcde                                 |
|                                           | VALTA   | 3mob → valL                           | abcde : abcde                                 |
|                                           | MOBDH   | accoa + 3mob → leuL + co2             | ab + cdefg : abdfge + c                       |
|                                           | ACTTS   | pyr + thrL → ileL + co2               | efg + abcd : abfcdg + e                       |
| Tyrosine and phenylalanine metabolism     | SKDH    | pep + e4p ↔ skm                       | abc + ghij : abcghij                          |
|                                           | CHRS    | pep + skm → chor                      | def + abcghij : abcdefghij                    |
|                                           | CHORM   | chor → pphn                           | abcdefghij : abcdefghij                       |
|                                           | PPHNDH1 | pphn → tyrL + co2                     | abcdefghij : abcefghij + d                    |
|                                           | PPHNDH2 | pphn → pheL + co2                     | abcdefghij : abcefghij + d                    |
| Histidine and tryptophan metabolism       | PRPPS   | r5p + mlthf → his-L                   | abcde + f : edcbaf                            |
|                                           | Tipsyn  | serL + r5p → tip + g3p                | abc + defgh : abcd + fgh                      |
|                                           | Trpsyn  | tip + pre → trpL                      | abcd + BCEFGH : abcdCEFGHB                    |
|                                           | AR5PT   | r5p + chor → g3p + pyr + indole + co2 | defgh + pqrijklmno : fgh + pqr + edklmnoj + i |
|                                           | TRPS2   | serL + indole → trpL                  | abc + edklmnoj : abcdklmnoj                   |
|                                           | PRPPS   | r5p + mlthf → hisL                    | abcde + f : edcbaf                            |
| Biomass fluxes:                           | G6Pbm   | g6p → g6pbm                           | abcdef : abcdef                               |
|                                           | F6Pbm   | f6p → f6pbm                           | abcdef : abcdef                               |
|                                           | R5Pbm   | r5p → r5pbm                           | abcde : abcde                                 |
|                                           | G3Pbm   | g3p → g3pbm                           | abc : abc                                     |
|                                           | PEPbm   | pep → pepbm                           | abc : abc                                     |
|                                           | AcCoabm | accoa → accoabm                       | ab : ab                                       |
|                                           | CO2bm   | co2 → co2bm                           | a : a                                         |
