# Supplementary material for: A Peptide-Based Method for 13C Metabolic Flux Analysis in Microbial Communities
Source: PubMed Central journal article supplement (PMC4154649; doi:10.1371/journal.pcbi.1003827), 2014-09-04
Supplement: pcbi.1003827.s012.pdf [file pcbi.1003827.s012.pdf]

**Table S4.** List of *Methanococcus maripaludis* reactions included in peptide and aminoacid based <sup>13</sup>C MFA methods, along with their corresponding carbon transitions.

|                                  | <i>Reaction Name</i>      | <i>Reaction</i>         | <i>Carbon transitions</i>                  |                               |
|----------------------------------|---------------------------|-------------------------|--------------------------------------------|-------------------------------|
|                                  |                           |                         | obtained from Antoniewicz <i>et al</i> [1] |                               |
| Glycolysis/gluconeogenesis       | ACpts                     | ac → accoa              | ab : ab                                    |                               |
|                                  | PGM                       | g6p ↔ g1p               | abcdef : abcdef                            |                               |
|                                  | PGI                       | g6p ↔ f6p               | abcdef : abcdef                            |                               |
|                                  | PFK                       | f6p ↔ fdp               | abcdef : abcdef                            |                               |
|                                  | FBA                       | fdp ↔ g3p + g3p         | CBAabc : abc + ABC                         |                               |
|                                  | GPDH                      | g3p ↔ 3pg               | abc : abc                                  |                               |
|                                  | PGMTe                     | 3pg ↔ pep               | abc : abc                                  |                               |
|                                  | PYK_f                     | pep → pyr               | abc : abc                                  |                               |
|                                  | PYK_b                     | pyr → pep               | abc : abc                                  |                               |
|                                  | PFOXDR                    | pyr → co2 + accoa       | abc : a + bc                               |                               |
|                                  | PYRCO2L                   | pyr + co2 → oaa         | abc + d : abcd                             |                               |
|                                  | Pentose Phosphate Pathway | RPI                     | xu5pD ↔ r5p                                | abcde : abcde                 |
|                                  |                           | TKT1                    | xu5pD + r5p ↔ g3p + s7p                    | ABCDE + abcde : CDE + ABabcde |
| TALA                             |                           | g3p + s7p ↔ f6p + e4p   | ABC + abcdefg : abcABC + defg              |                               |
| TKT2                             |                           | xu5pD + e4p ↔ g3p + f6p | abABC + cdef : ABC + abcdef                |                               |
| Citric Acid Cycle/TCA            | AKGS                      | akg ↔ succoa + co2      | abcde : bcde + a                           |                               |
|                                  | SUCOAS                    | succ ↔ succoa           | bcde : (bcde;edcb)                         |                               |
|                                  | SUCOXDR                   | succ ↔ fum              | abcd : abcd                                |                               |
|                                  | FUM                       | fum ↔ mal-L             | abcd : abcd                                |                               |
|                                  | MDH                       | mal-L ↔ oaa             | abcd : abcd                                |                               |
| Methane production               | FDH                       | for --> co2             | a : a                                      |                               |
|                                  | FMFD                      | co2 --> formf           | a : a                                      |                               |
|                                  | CMOD                      | co2 --> co              | a : a                                      |                               |
|                                  | ACSCMD                    | co + ch3tmp --> accoa   | a + b : ab                                 |                               |
|                                  | FTHMPFT                   | formf --> formtp        | a : a                                      |                               |
|                                  | MTHMPC                    | formtp --> chtmp        | a : a                                      |                               |
|                                  | MTHMPD                    | chtmp --> ch2tmp        | a : a                                      |                               |
|                                  | MTHMPR                    | ch2tmp --> ch3tmp       | a : a                                      |                               |
|                                  | MTHMP                     | ch3tmp --> ch3CoM       | a : a                                      |                               |
|                                  | MCMR                      | ch3CoM --> ch4          | a : a                                      |                               |
| Alanine and aspartate metabolism | ALATRA                    | pyr → ala-L             | abc : abc                                  |                               |
|                                  | ASPTA                     | oaa → asp-L             | abcd : abcd                                |                               |
|                                  | ASNS                      | aspL → asn-L            | abcd : abcd                                |                               |
|                                  | CYSMETT                   | homL + mlthf → metL     | abcd + e : abcde                           |                               |
| Glutamate metabolism             | GLUD                      | akg → glu-L             | abcde : abcde                              |                               |
|                                  | GLNS                      | glu-L → gln-L           | abcde : abcde                              |                               |
|                                  | PROOX                     | gluL → pro-L            | abcde : abcde                              |                               |
|                                  | GLUACTR                   | gluL + co2 → arg-L      | abcde + f : abcdef                         |                               |
| Glycine and serine metabolism    | PGDH                      | 3pg → ser-L             | abc : abc                                  |                               |
|                                  | GHMT2r                    | ser-L ↔ mlthf + gly     | abc : c + ab                               |                               |
|                                  | SERACT                    | serL → cysL             | abc : abc                                  |                               |

Threonine and lysine metabolism

|        |                   |                      |
|--------|-------------------|----------------------|
| HSDy   | asa → homL        | abcd : abcd          |
| THRLS  | homL → thrL       | abcd : abcd          |
| ASPSDH | aspL → asa        | abcd : abcd          |
| DHDPS  | pyr + asa → ddp   | efg + abcd : abcdgfe |
| DHDPRy | ddp → thdp        | abcdefg : abcdefg    |
| DAPDC  | thdp → lysL + co2 | abcdefg : abcdef + g |

Valine, leucine and isoleucine metabolism

|        |                           |                         |
|--------|---------------------------|-------------------------|
| ValSyn | pyr → pyrb                | abc : abc               |
| ACLS   | pyrb + pyr → alacS + co2  | abc + def : abcef + d   |
| KADTi  | alacS → 3mob              | abcde : abcde           |
| VALTA  | 3mob → vall               | abcde : abcde           |
| MOBDH  | accoa + 3mob → leuL + co2 | ab + cdefg : abdfge + c |
| ACTTS  | pyr + thrL → ileL + co2   | efg + abcd : abfcdg + e |

Tyrosine and phenylalanine metabolism

|         |                   |                             |
|---------|-------------------|-----------------------------|
| SKDH    | pep + e4p ↔ skm   | abc + ghij : abcghij        |
| CHRS    | pep + skm → chor  | def + abcghij : abcdefghij  |
| CHORM   | chor → pphn       | abcdefghij : abcdefghij     |
| PPHNDH1 | pphn → tyrL + co2 | abcdefghij : abcefg hij + d |
| PPHNDH2 | pphn → pheL + co2 | abcdefghij : abcefg hij + d |

Histidine and tryptophan metabolism

|        |                                       |                                               |
|--------|---------------------------------------|-----------------------------------------------|
| PRPPS  | r5p + mlthf → his-L                   | abcde + f : edcbaf                            |
| Tipsyn | serL + r5p → tip + g3p                | abc + defgh : abced + fgh                     |
| Trpsyn | tip + pre → trpL                      | abced + BCEFGH : abcedCEFGHB                  |
| AR5PT  | r5p + chor → g3p + pyr + indole + co2 | defgh + pqrijklmno : fgh + pqr + edklmnoj + i |
| TRPS2  | serL + indole → trpL                  | abc + edklmnoj : abcedklmnoj                  |
| PRPPS  | r5p + mlthf → hisL                    | abcde + f : edcbaf                            |

Biomass fluxes:

|         |                 |                       |
|---------|-----------------|-----------------------|
| G3Pbm   | g3p → g3pbm     | abc : abc             |
| AcCoabm | accoa → accoabm | ab : ab               |
| Ilebm   | ile-L → ilebm   | abcdef : abcdef       |
| Leubm   | leu-L → leubm   | abcdef : abcdef       |
| Valbm   | val-L → valbm   | abcde : abcde         |
| Tyrbm   | tyr-L → tyrbm   | abcdefghi : abcdefghi |
| Phebm   | phe-L → phebm   | abcdefghi : abcdefghi |
