# Supplementary material for: A Peptide-Based Method for 13C Metabolic Flux Analysis in Microbial Communities
Source: PubMed Central journal article supplement (PMC4154649; doi:10.1371/journal.pcbi.1003827), 2014-09-04
Supplement: pcbi.1003827.s013.pdf [file pcbi.1003827.s013.pdf]

**Table S5.** The Peptide sequences from trypsin digestion of *D. vulgaris* and *M.maripaludis* proteins. The peptide labeling profile of these sequences have been used to measure flux profiles for *D. vulgaris* and *M. maripaludis* strains in a community using the peptide-based method.

| <b><i>D. vulgaris</i><br/>10AA</b> | <b><i>M.maripaludis</i><br/>10AA</b> |
|------------------------------------|--------------------------------------|
| GTALSGDDVR                         | DDFEPVNEVK                           |
| EGLTAVVSVK                         | NPEITDEENK                           |
| EGGTHLAGFK                         | FLDEIINIFK                           |
| SILENIEVLR                         | NMLTVSDAHK                           |
| AIMLELSDGR                         | ISIIASGGIR                           |
| LAEEEEAAHAR                        | FGVNSEYLNK                           |
| IVHPLESLTR                         | EHPVWTPEVK                           |
| LEEALLQSEK                         | ACSFIESELK                           |
| IEVPGAAAIR                         | HIQEYTLDEK                           |
| GPMPPGAVMR                         | IFCDGGLYIK                           |
| AIEAPSSPEK                         | GIFEPENIEK                           |
| DSVVTCTVGR                         | GGSQPAIEK                            |
| DYAPLLLLWK                         | VAILGAGCYR                           |
| KPLSSLPADK                         | DENWYVSVCR                           |
| QGDTLYSIAR                         | NVAVETVMTK                           |
| SAVNFTAGAR                         | FVIITQSGQK                           |
| LYEYENFGHK                         | SLEMLNNNEK                           |
| LDASGSSELR                         | IDENELNMIK                           |
| TALLDAGIVR                         | ILVTTNLLYR                           |
| AALEVAADR                          | LQELGLEASR                           |
